# Supplementary material for: Patients’ Anticipation for the Pharmacies of Rural Communities: A Qualitative Study from Pakistan
Source: MDPI journal article supplement (doi:10.3390/ijerph16010143), 2019-01-07
Supplement: s1 [file s1]

## Interview guide

### **Demographics**

Age: \_\_\_\_\_ Gender: \_\_\_\_\_

Education status: \_\_\_\_\_ Monthly income: \_\_\_\_\_

Reason of Visit/Disease: \_\_\_\_\_

### **A. Current Services**

1. How you find the rural pharmacies as compare to urban pharmacies ?
2. What is your opinion about premises and area of pharmacies in your locality ?
3. How the working of pharmacies in your locality justifies the need of patients?
4. Does the pharmacy maintains high standard of desired medicines ?
5. How do you ranks the education and training of staff to their current job?
6. How the pharmacy manager/ owner / staff behaves to patients ?
7. What do you think about the staffing of pharmacy in your locality?
8. How the medicines are dispensed ?
9. How the staff of pharmacies inform you about the use of medicines ?
10. What are the major problems in the current services of pharmacy ?
11. What additional facilities are provided by pharmacies

### **B. Suggestions**

12. Do you expect any type of more services ?
13. How can be services improved?
14. Which stake holder like drug inspector, doctor, pharmacy owner can majorly contribute to improve services?
